# Supplementary material for: Super Secondary Structures of Proteins with Post-Translational Modifications in Colon Cancer
Source: MDPI journal article supplement (doi:10.3390/molecules25143144), 2020-07-09

**Table S1. BLOCK 1 Rules for recognition and selection of a helical pair for a peptide fragment**

1. Analysis of the secondary structure of the amino acid chain is carried out using the Dictionary for Secondary Structure of Protein. Search for sections of helices of the following types:  $\alpha$ -, 310-, and  $\pi$ - helix.

2. A helical pair is a portion of the protein structure that is formed by two helices adjacent to the polypeptide chain connected by an unstructured fragment (coil) of arbitrary length and configuration.

3. The following types of helical pairs are found in proteins:  $\alpha$ - $\alpha$ -corner,  $\alpha$ - $\alpha$ -hairpin, and V- and L-structures.

4. Each helix of a pair can be inscribed in a cylinder. The cylinder axis is determined by the least squares method with the minimum deviation of the helix parameters from the ideal helix.

5. Two axes of the helices determine the spatial structure of the helical pair. The spatial structure of the helical pair is determined by the interplanar distance ( $d$ ) and the projections of the axes of the helices on the plane.

6. The polygon area ( $S$ ) of the intersection of the projections of the helices depends on the relative position of the helices (geometry) and the diameter of the cylinders of the helices. The cylinder diameter is determined by the type of helix and the average size of the side chain.

### **Distinctive properties of types of helical pairs**

#### **1. $\alpha$ - $\alpha$ corner**

- dense orthogonal packing of helices;
- the projections of the helices and the axis of the helices intersect;
- the values of the interplanar distance and the minimum distance are equal ( $d = r$ );
- the intercoil distance within  $d \approx (9-11) \text{ \AA}$ ;
- the area and perimeter of the intersection of the projections of the helices are larger than the other two- helix motifs;
- torsion  $\theta$  and flat  $\varphi$  inter helix angles have values of 70-110°;

- the length of the waist ( $N_p$ ) is usually 4-5 amino acids.

## **2. $\alpha$ - $\alpha$ -hairpin**

- dense antiparallel packing of helices;
- the projections of the helices intersect, but the axes of the helices do not intersect;
- the range of the intercoil distance,  $d$ , is wider than that of the  $\alpha$ - $\alpha$  corner;
- interhelix angles  $0$ - $30^\circ$ ;
- the length of the waist ( $N_p$ ) may vary;
- usually consists of two long helices.

## **3. L-shaped structure**

- dense bevelled packaging of helices;
- the projections of the helices and the axes of the helices do not intersect ( $S \approx 0 \text{ \AA}^2$ ,  $P \approx 0 \text{ \AA}$ );
- interhelix angle has a value  $\varphi \approx 90^\circ$ ;
- The waist length ( $N_p$ ) may vary.

## **4. V-shaped structure**

- dense bevelled packaging of helices;
- the projections of the helices (most often) and the axes of the helices do not intersect;
- area,  $S$ , and perimeter have values close to zero;
- interhelix angle  $\varphi \approx 50^\circ$ ;
- coil ( $N_p$ ), as a rule, consists of one amino acid;
- length of the helices, as a rule, does not exceed three to four turns.

**Table S2. Data of colon cancer patients**

| <b>N</b> | <b>Sex</b> | <b>Age, years</b> | <b>Diagnosis</b>  | <b>Stage</b> | <b>Metastases</b>  |
|----------|------------|-------------------|-------------------|--------------|--------------------|
| 2        | Female     | 56                | colorectal cancer | IV           | in the liver       |
| 3        | Female     | 59                | colorectal cancer | IIIc         | No                 |
| 4        | Female     | 28                | colorectal cancer | IIa          | No                 |
| 5        | Female     | 69                | colorectal cancer | IV           | in the ovaries     |
| 6        | Female     | 54                | colorectal cancer | IV           | in the liver       |
| 8        | Male       | 85                | colorectal cancer | IV           | in the liver       |
| 9        | Male       | 63                | colorectal cancer | IV           | in the lymph nodes |
| 10       | Female     | 43                | colorectal cancer | I            | No                 |
| 11       | Female     | 76                | colorectal cancer | IIa          | No                 |
| 12       | Male       | 46                | colorectal cancer | IIa          | No                 |
| 13       | Female     | 64                | colorectal cancer | I            | No                 |
| 14       | Female     | 41                | colorectal cancer | IVb          | in the liver       |
| 15       | Female     | 69                | colorectal cancer | IIIa         | No                 |
| 16       | Female     | 81                | colorectal cancer | I            | No                 |
| 18       | Female     | 32                | colorectal cancer | IIIa         | No                 |
| 19       | Male       | 50                | colorectal cancer | I            | No                 |
| 20       | Female     | 60                | colorectal cancer | I            | No                 |
| 21       | Female     | 31                | colorectal cancer | IIa          | No                 |
| 22       | Female     | 55                | anal canal        | I            | No                 |
| 23       | Female     | 64                | colorectal cancer | IIIc         | No                 |
| 24       | Male       | 45                | colorectal cancer | IV           | in the lymph nodes |
| 25       | Male       | 58                | colorectal cancer | IIa          | No                 |
| 26       | Female     | 60                | colorectal cancer | IIa          | No                 |
| 28       | Male       | 93                | colorectal cancer | IIa          | No                 |
| 30       | Female     | 70                | colorectal cancer | IIa          | No                 |
| 31       | Female     | 64                | colorectal cancer | IIIb         | No                 |
| 42       | Male       | 81                | colorectal cancer | I            | No                 |
| 54       | Male       | 58                | colorectal cancer | IIIb         | No                 |

**Data of healthy volunteers**

| <b>Sample</b> | <b>Sex</b> | <b>Age, years</b> |
|---------------|------------|-------------------|
| 1             | Female     | 53                |
| 2             | Female     | 38                |
| 3             | Female     | 58                |
| 4             | Female     | 49                |
| 5             | Male       | 70                |
| 6             | Female     | 41                |
| 7             | Male       | 61                |

|    |        |    |
|----|--------|----|
| 8  | Female | 45 |
| 9  | Male   | 46 |
| 10 | Male   | 41 |
| 11 | Female | 55 |
| 12 | Female | 60 |
| 13 | Female | 56 |
| 14 | Female | 52 |
| 15 | Male   | 59 |
| 16 | Male   | 62 |
| 17 | Male   | 39 |
| 18 | Female | 40 |
| 20 | Female | 39 |
| 22 | Male   | 44 |
| 24 | Female | 46 |
| 25 | Male   | 55 |
| 26 | Female | 42 |
| 28 | Male   | 40 |
| 29 | Male   | 44 |
| 30 | Male   | 40 |
| 31 | Male   | 44 |
| 32 | Male   | 40 |
| 35 | Female | 48 |
| 37 | Female | 39 |
| 38 | Male   | 39 |
| 42 | Male   | 42 |
| 43 | Male   | 39 |
| 44 | Male   | 34 |
| 46 | Male   | 53 |
| 47 | Female | 53 |
| 50 | Female | 47 |
| 51 | Female | 52 |
| 60 | Male   | 64 |
| 61 | Female | 49 |
| 62 | Female | 45 |

The recorded raw data were converted to peak lists for search engines and deposited to the ProteomeXchange Consortium via the PRIDE partner repository with the dataset identifier PXD015163.

**Table S3**

| UniProt AC | Protein name                               | Peptide*                      | ID PDB | Localization** | PTM    | Number of samples | Stage***  |
|------------|--------------------------------------------|-------------------------------|--------|----------------|--------|-------------------|-----------|
|            |                                            | LKCASLQK                      | 1AO6   | 199            | ac (K) | 11                | I;II;IV   |
| ALBU       | Serum albumin                              | ICIAEVENDEMPADLPSLAADFVESKDVC | 1AO6   | 313            | ac (K) | 5                 | II-IV     |
|            |                                            | ADLAKYICENQDSISSK             | 1AO6   | 262            | ac (K) | 2                 | IV        |
|            |                                            | LVNEVTEFAKTCVADESAENCDK       | 1AO6   | 51             | ac (K) | 3                 | I; II; IV |
|            |                                            | YICENQDSISSK                  | 1AO6   | 263            | p (Y)  | 2                 | II; IV    |
| VTDB       | Vitamin D-binding protein                  | VLEPTLKSLGECCDVEDSTTCFNAK     | 1J78   | 354            | ac (K) | 1                 | II        |
|            |                                            | SCESNSPFPVHPGTAECCTKEGLER     | 1J78   | 114            | ac (K) | 1                 | I         |
| A2MG       | Alpha-2-macroglobulin                      | SKAIGYLNTGYQR                 | 4ACQ   | 1003           | ac (K) | 1                 | III       |
| CO4A       | Complement C4-A                            | LLATLCSAEVCQCAEGKCPR          | 5JPN   | 1594           | ac (K) | 1                 | I         |
| XRCC6      | X-ray repair cross-complementing protein 6 | IISDRDLLAVVFYGTAK             | 1JEQ   | 77             | p (S)  | 1                 | IV        |
| IC1        | Plasma protease C1 inhibitor               | LVLLNAIYLSAK                  | 5DU3   | 272            | p (Y)  | 2                 | I; IV     |

"Peptide\*" indicates tryptic peptides

"Localization\*\*" indicates locus aminoacid with PTM in the protein sequence (ID PDB)

"Stage\*\*\*" indicates the stage of development of the cancer from I to IV

**Figure S1** Three-dimensional protein structures extracted from the PDB DB with indicating spatial localizations of modified amino acids (highlighted in red and arrows in the figure). The insets show the corresponding proteins geometric of a supersecondary structure formed by two helices. (A) ALBU (PDB ID 1AO6) with 5 modified amino acids with lysine acetylation (Ac(K)) and tyrosine phosphosylation (P(Y)); (B) A2MG (PDB ID 4ACQ), (C) IC1 (PDB ID 5DU3), (D) VTDB (PDB ID 1J78), (E) CO4A (PDB ID 5JPN) with lysine acetylation; (F) XRCC-6 (PDB ID 1JEQ) with phosphorylated serine (P(S)).

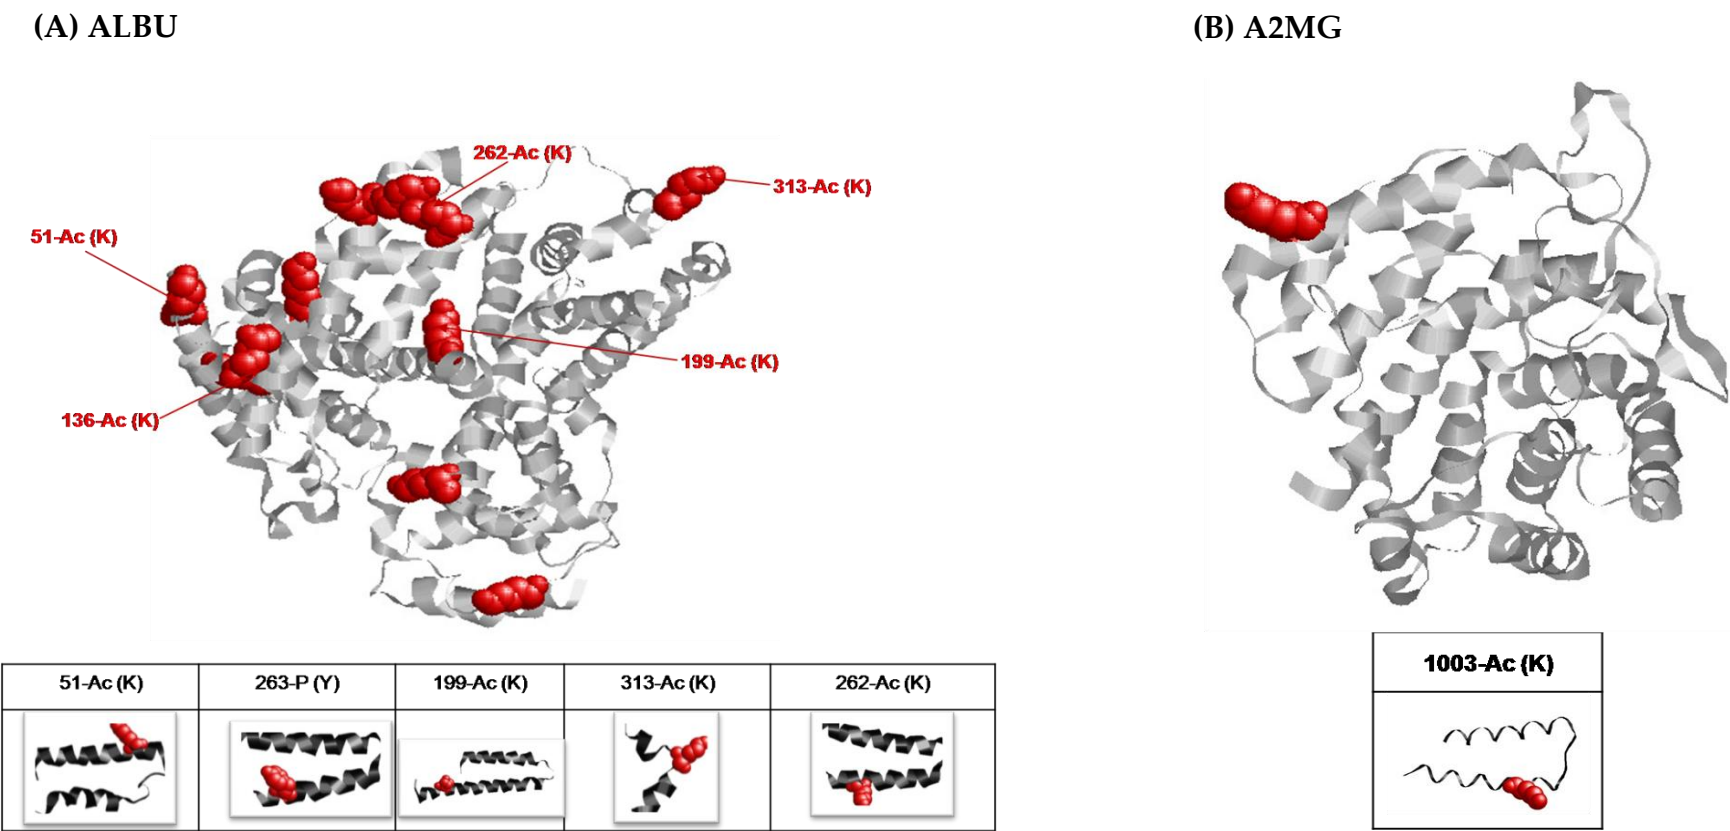

(C) IC1

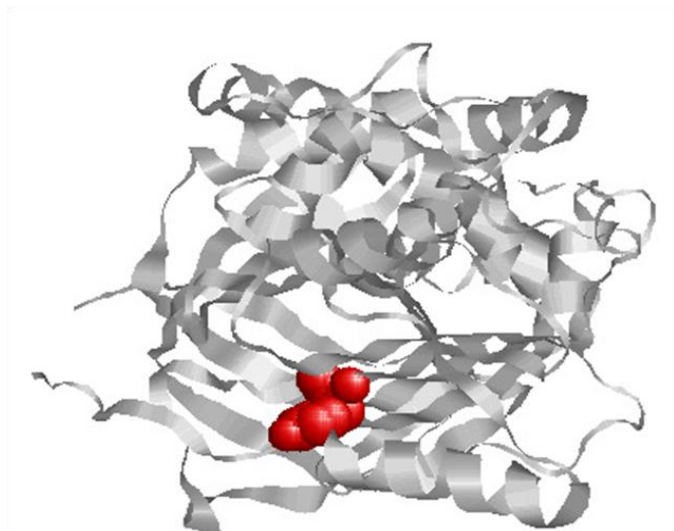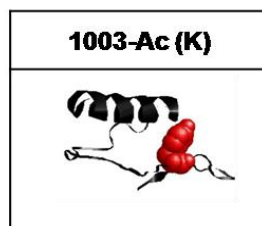

(D) VTDB

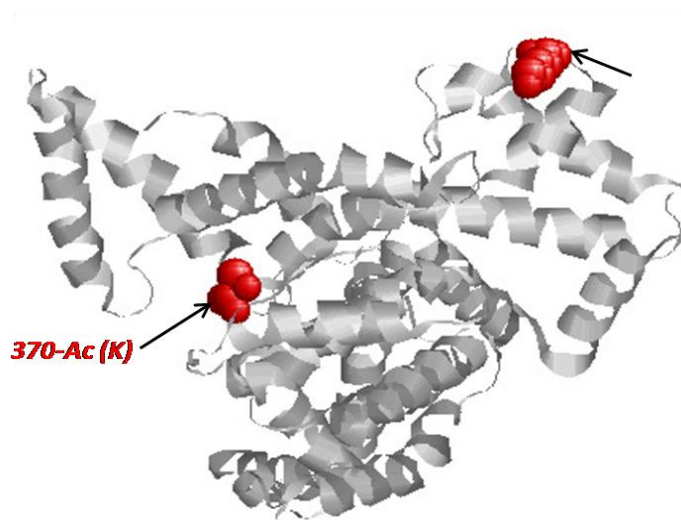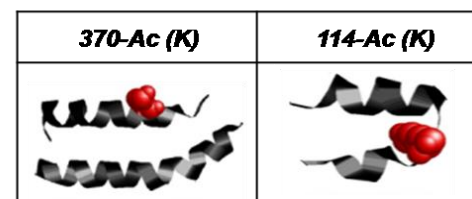

(E) CO4A

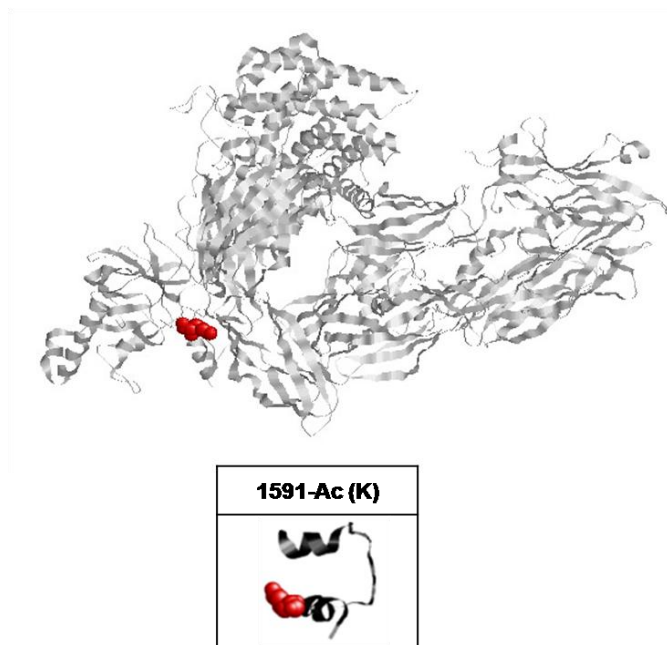

(F) XRCC-6

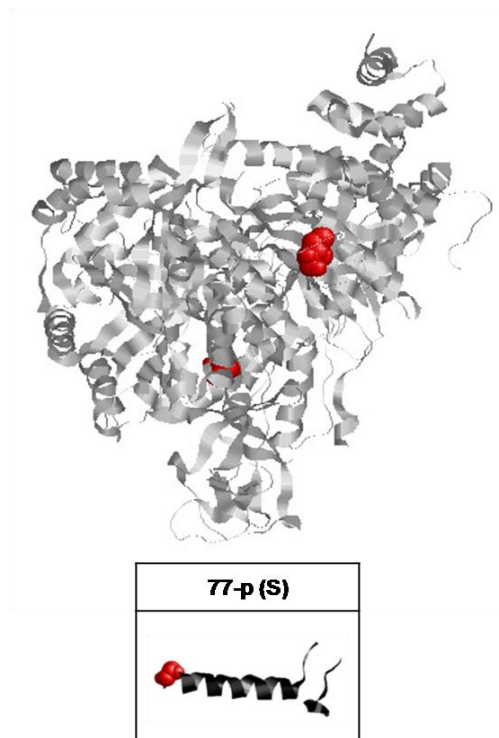

Supplement: s1 [file s1]
